# Supplementary material for: Prevalence of pathogens and antimicrobial resistance of isolated Staphylococcus spp. in bovine mastitis milk in South Korea, 2018–2022
Source: PubMed Central journal article supplement — J Vet Med Sci. 2024 Oct 11;86(12):1219–26. doi: 10.1292/jvms.24-0239 (PMC11612239; doi:10.1292/jvms.24-0239), 2024-10-11
Supplement: jvms-86-1219-s001.pdf [file jvms-86-1219-s001.pdf]

Supplementary Table 1. Primers used in this study

| Target        |             | Nucleotide sequence (5'-3')                                                     | Fragment size (bp) | Annealing temperature | Reference |
|---------------|-------------|---------------------------------------------------------------------------------|--------------------|-----------------------|-----------|
| Lincosamides  | <i>InuA</i> | F: GGTGGCTGGGGGGTAGATGTA<br>TTAACTGG<br>R: GCTTCTTTTGAAATACATGGTA<br>TTTTTCGATC | 323                | 57                    | 27        |
|               | <i>InuB</i> | F: CCTACCTATTGTTTGTGGAA<br>R: ATAACGTTACTCTCCTATTC<br>R: AAATGACCTTCTTTCTTA     | 925                | 54                    | 9         |
| Macrolides    | <i>ermA</i> | F: AGTCAGGCTAAATATAGCTATC<br>R: CAAGAACAATCAATACAGAGT<br>CTAC                   | 157                | 63                    | 24        |
|               | <i>ermB</i> | F: GGTTGCTCTTGACACTCAAG<br>R: CAGTTGACGATATTCTCGATTG                            | 191                | 63                    | 24        |
|               | <i>ermC</i> | F: AATCGTGGAATACGGGTTTGC<br>R: CGTCAATTCCTGCATGTTTTA<br>AGG                     | 293                | 63                    | 24        |
| Penicillins   | <i>blaZ</i> | F: ACTTCAACACCTGCTGCTTTC<br>R: TGACCACTTTTATCAGCAACC                            | 173                | 54                    | 28        |
|               | <i>mecA</i> | F: TCCAGGAATGCAGAAAGACA<br>AAAGC<br>R: GACACGATAGCCATCTTCAT<br>GTTGG            | 499                | 55                    | 29        |
| Tetracyclines | <i>tetK</i> | F: TCGATAGGAACAGCAGTA<br>R: CAGCAGATCCTACTCCTT                                  | 169                | 55                    | 37        |
|               | <i>tetL</i> | F: TCGTTAGCGTGCTGTCATTC<br>R: GTATCCCACCAATGTAGCCG                              | 267                | 55                    | 37        |
|               | <i>tetM</i> | F: GTGGACAAAGGTACAACGAG<br>R: CGGTAAAGTTTCGTCACACAC                             | 406                | 55                    | 37        |
|               | <i>tetO</i> | F: AACTTAGGCATTCTGGCTCAC<br>R: TCCCACTGTTCCATATCGTCA                            | 515                | 55                    | 37        |
